# Supplementary material for: Direct observation of the reduction of carbon dioxide by rhenium bipyridine catalysts
Source: Royal Society of Chemistry journal article supplement (doi:10.1039/c3ee42186d), 2013-01-01
Supplement: c3ee42186d.pdf [file c3ee42186d.pdf]

# Supplementary Information

## Direct Observation of the Reduction of Carbon Dioxide by Rhenium Bipyridine Catalysts

Matthew D. Sampson,<sup>a</sup> Jesse D. Froehlich,<sup>a</sup> Jonathan M. Smieja,<sup>a</sup> Eric E. Benson,<sup>a</sup> Ian D. Sharp,<sup>b,c</sup> and Clifford P. Kubiak<sup>\*a</sup>

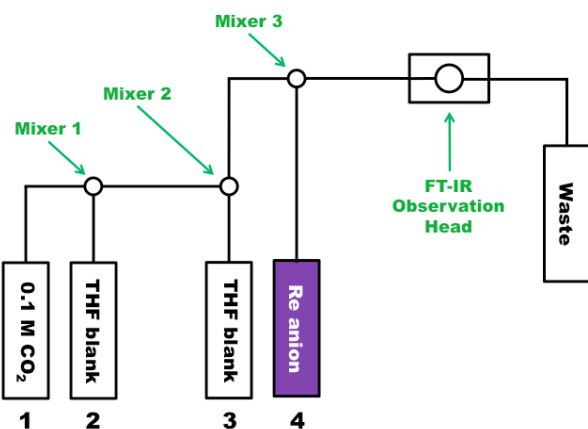

Fig. S1. Mixing schematic for a typical stopped-flow IR spectroscopy experiment.

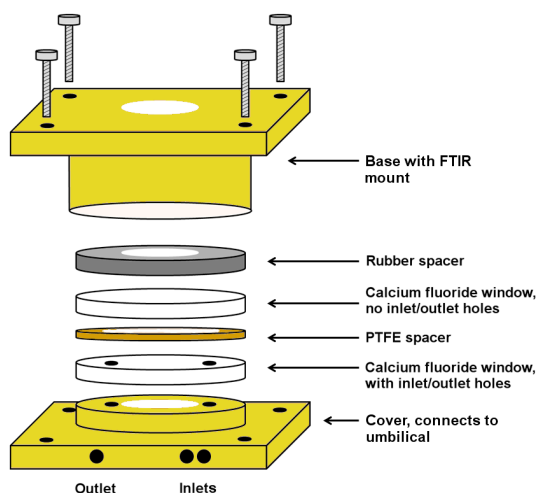

Fig. S2. Schematic of the flow through FTIR observation head for the Biologic SFM 400 stopped flow instrument. The observation head contains two inlet ports, and the final mixing event (mixer 3 in Fig. S1) occurs immediately prior to introduction of solution to the transmission cell.

### Reaction of $[\text{Re}(\text{bpy-}t\text{Bu})(\text{CO})_3]^-$ (**1**) or $[\text{Re}(\text{bpy})(\text{CO})_3]^-$ (**2**) with $\text{CO}_2$

A comparison of the IR spectrum of  $\text{Re}(\text{bpy-}t\text{Bu})(\text{CO})_3\text{Cl}$  and the product of the stopped-flow reaction between **1** and  $\text{CO}_2$  is shown in Fig. S3.

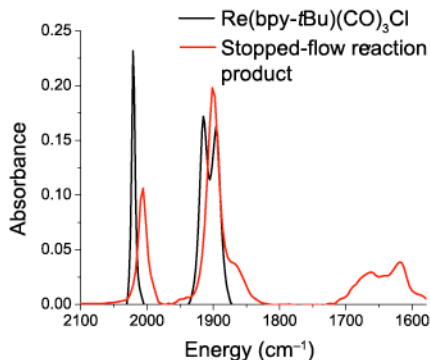

**Fig. S3.** Comparison of the IR spectra of  $\text{Re}(\text{bpy-}t\text{Bu})(\text{CO})_3\text{Cl}$  (black) and the product from stopped-flow reactions involving **1** and  $\text{CO}_2$  (red).

Complex **2** reacts with  $\text{CO}_2$ , yielding an IR spectrum that indicates the presence of two products (Fig. S4). The  $\nu_{\text{CO}}$  stretches at 2009 and 1901  $\text{cm}^{-1}$  are consistent with a Re(I) product which is similar to that observed in the reaction of **1** with  $\text{CO}_2$ . The  $\nu_{\text{CO}}$  stretches at 1886, 1948, 1886, and 1867  $\text{cm}^{-1}$  match precisely with those reported for the  $[\text{Re}(\text{bpy})(\text{CO})_3]_2$  dimer.<sup>1,2</sup> For complex **2**, no appreciable formation of intermediates before formation of the fully oxidized species and the Re(0) dimer was observed. This Re(0) dimer has been proposed as a degradation pathway for the  $\text{Re}(\text{bpy})(\text{CO})_3\text{Cl}$  family of catalysts.<sup>2</sup> Additionally, the  $[\text{Re}(\text{bpy})(\text{CO})_3]_2$  dimer could form upon oxidation of anion **2** by the Re(I) product. Dimer formation is not observed as a product of the reactions of **1** with  $\text{CO}_2$ , suggesting that the *t*Bu groups at the 4,4'-positions of the bpy ligand provide sufficient steric hindrances and/or electronic differences to eliminate this degradation pathway. The presence of this degradation pathway, as well as other factors, helps explain the observed reduced rates of electrocatalysis for **2** as compared to **1**.<sup>3</sup>

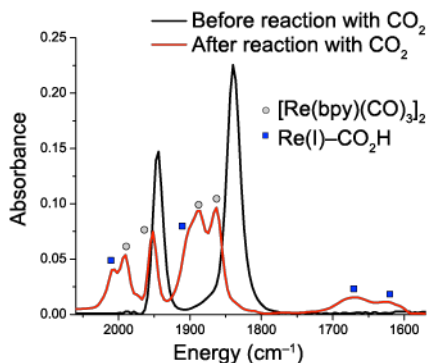

**Fig. S4.** IR spectra of **2** before reaction with  $\text{CO}_2$  (black) and after reaction with  $\text{CO}_2$  (red). Grey circles indicate  $\nu_{\text{CO}}$  stretches that correspond to the dimer,  $[\text{Re}(\text{bpy})(\text{CO})_3]_2$ , and blue squares indicate  $\nu_{\text{CO}}$  stretches that correspond to the  $\text{Re(I)}-\text{CO}_2\text{H}$  product.

In each reaction, no additional species between the starting anionic complexes and the oxidized products are observed. Therefore, we classify these reactions as fast, net two-electron oxidative additions of  $\text{CO}_2$  to the metal centers. It is possible that intermediate species do form, but are fleeting and only accumulate in very small concentrations due to fast conversion to the final state. However, this assignment is supported by experiments with higher concentrations of starting material (15 mM **1** or **2**), which also show no intermediate species.

## Isotopic Labeling Experiments

Reactions with  $^{13}\text{CO}_2$  were performed nearly identically to the reactions with unlabeled  $\text{CO}_2$ , and the stopped-flow mixing schematic was the same as shown in Fig. S1. However, due to a limited supply of  $^{13}\text{CO}_2$ , it was not possible to sparge THF for a significant amount of time. Nevertheless, we were successful in dissolving *ca.* 80 mM  $^{13}\text{CO}_2$  in solution (as calculated from the extinction coefficient for  $\text{CO}_2$  in the IR,  $1300 \text{ M}^{-1}\text{cm}^{-1}$ ) (Fig. S5). Here, the  $^{13}\text{CO}_2$  peak can be seen at  $2272 \text{ cm}^{-1}$ , as compared to  $2333 \text{ cm}^{-1}$  for unlabeled  $\text{CO}_2$  (a shift of  $\sim 61 \text{ cm}^{-1}$ ).

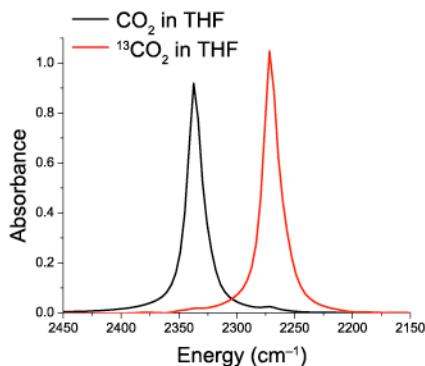

**Fig. S5** IR spectra of pure  $\text{CO}_2$  in THF (black) and pure  $^{13}\text{CO}_2$  in THF (red), showing the shift of the  $\text{CO}_2$  peak from  $2333 \text{ cm}^{-1}$  to  $2268 \text{ cm}^{-1}$ .

## Experiments with added $\text{H}^+$

In addition to reactions with added MeOH, we also performed stopped-flow experiments with added  $\text{H}_2\text{O}$ . These experiments were performed in the same manner as experiments with added MeOH, with 2.5 mM **1**, 25 mM  $\text{CO}_2$ , and *ca.* 0–200 mM  $\text{H}_2\text{O}$ . Very similar reaction kinetics are observed with added  $\text{H}_2\text{O}$ , very much like the experiments with added MeOH. As shown in Fig. S6, with added  $\text{H}_2\text{O}$ , the rate of formation of the stopped-flow reaction product increases significantly. Due to this drastic increase, it is very difficult to distinguish differences in the dependence of these IR frequencies with small differences in  $\text{pK}_a$ 's of various weak Brønsted acids. In this study, we are limited to weak Brønsted acids with a narrow  $\text{pK}_a$  range because acids with too high of  $\text{pK}_a$ 's will cause Re anions to favor engaging protons over  $\text{CO}_2$ .

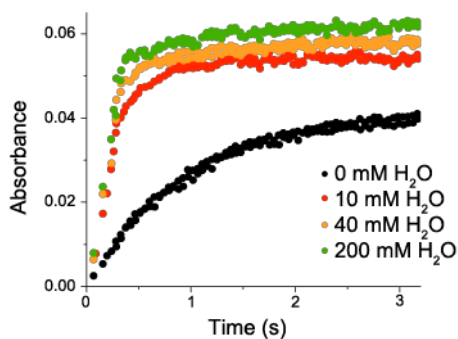

**Fig. S6.** Growth of the  $\nu_{\text{OCO}}$  stretch at  $1616 \text{ cm}^{-1}$  as a function of time for the reaction of 2.5 mM **1** with 25 mM  $\text{CO}_2$  with the addition of various concentrations of  $\text{H}_2\text{O}$ .

### Genuine $\text{Re}(\text{bpy})(\text{CO})_3(\text{CO}_2\text{H})$ (**2**- $\text{CO}_2\text{H}$ )

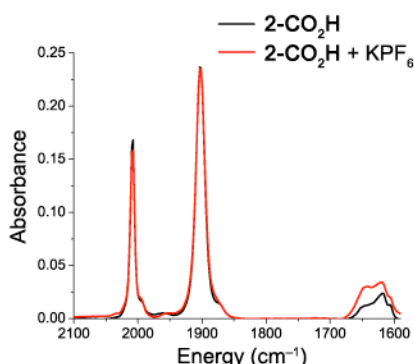

**Fig. S7.** Comparison of the IR spectra of **2**- $\text{CO}_2\text{H}$  without  $\text{KPF}_6$  (black) and with  $\text{KPF}_6$  (red). Spectra are normalized relative to each other.

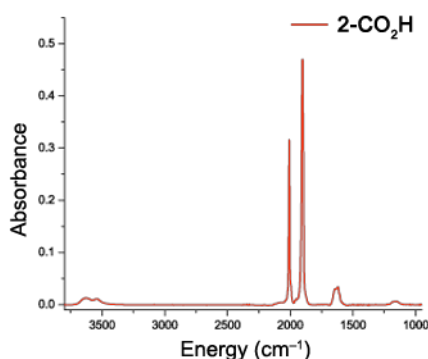

**Fig. S8.** Full IR spectrum of **2**- $\text{CO}_2\text{H}$  in MeCN from  $4000\text{ cm}^{-1}$  to  $1000\text{ cm}^{-1}$ .

**Table S1.** IR stretching frequencies of **1**- $\text{CO}_2\text{H}$  and **2**- $\text{CO}_2\text{H}$  in stopped-flow reactions, synthesized solutions, and gas-phase DFT calculations.

| Complex                          | IR stretching frequencies ( $\text{cm}^{-1}$ ) |                        |                  |
|----------------------------------|------------------------------------------------|------------------------|------------------|
|                                  | Stopped-flow reaction                          | Synthesized            | DFT-calculated   |
| <b>1</b> - $\text{CO}_2\text{H}$ | 2001, 1901, 1662, 1616                         | —                      | 1992, 1920, 1619 |
| <b>2</b> - $\text{CO}_2\text{H}$ | 2009, 1901, 1662, 1616                         | 2008, 1902, 1643, 1617 | 1997, 1926, 1616 |

### Disproving Carbonate Formation

In order to disprove carbonate ( $\text{CO}_3^{2-}$ ) formation in these stopped-flow experiments, we attempted to take an IR spectrum of a  $[\text{K}(\text{18-crown-6})]_2[\text{CO}_3]$  solution in THF. Tetraethylammonium hydroxide was reacted with  $\text{CO}_2$ , and this solution was placed under vacuum overnight to remove  $\text{H}_2\text{O}$ .  $\text{KPF}_6$ , 18-crown-6, and THF were added, and the solution was stirred for 10 minutes. The white precipitate was not very soluble in THF, and the IR spectrum of the saturated solution showed no IR features in the range of  $2100\text{--}1500\text{ cm}^{-1}$ . Therefore, it is unlikely that the  $\nu_{\text{OCO}}$  seen in the stopped-flow experiments ( $1616$  and  $1662\text{ cm}^{-1}$ ) are from  $\text{CO}_3^{2-}$ .

### Kinetic analysis

3D plots of the stopped-flow reaction of **2** with  $\text{CO}_2$  is shown in Fig. S9. Decays of the  $\nu_{\text{CO}}$  stretches at  $1940\text{ cm}^{-1}$  for **1** and **2** are shown in Fig. S10. Growths of the  $\nu_{\text{CO}}$  stretches at  $1901\text{ cm}^{-1}$  for **1** and **2** are shown in Fig. S11. Growths of the  $\nu_{\text{CO}}$  stretches at  $2001$  and  $2009\text{ cm}^{-1}$  for **1** and **2**, respectively, are shown in Fig. S12. Growths of the  $\nu_{\text{OCO}}$  stretches at  $1616$  and  $1662\text{ cm}^{-1}$  for **1** are shown in Fig. S13. The starting

$\nu_{\text{CO}}$  stretches at 1940 and 1832  $\text{cm}^{-1}$  decay with very similar rates to the growths of the  $\nu_{\text{CO}}$  stretches at 2001 and 1901  $\text{cm}^{-1}$  and to the growths of the  $\nu_{\text{OCO}}$  stretches at 1616 and 1662  $\text{cm}^{-1}$  (Fig. S14).

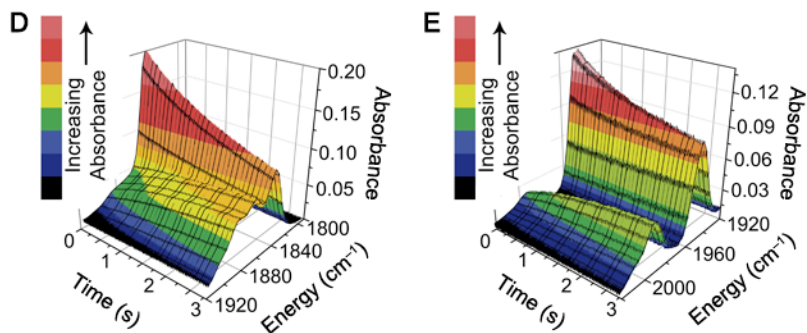

**Fig. S9.** Reaction of 2.5 mM **2** with 32 mM  $\text{CO}_2$ : (A) 3D plot of the reaction showing the decay of the  $\nu_{\text{CO}}$  stretch at 1840  $\text{cm}^{-1}$  and the growth of the  $\nu_{\text{CO}}$  stretch at 1901  $\text{cm}^{-1}$ ; (B) 3D plot of the reaction showing the decay of the  $\nu_{\text{CO}}$  stretch at 1940  $\text{cm}^{-1}$  and the growth of the  $\nu_{\text{CO}}$  stretch at 2009  $\text{cm}^{-1}$ .

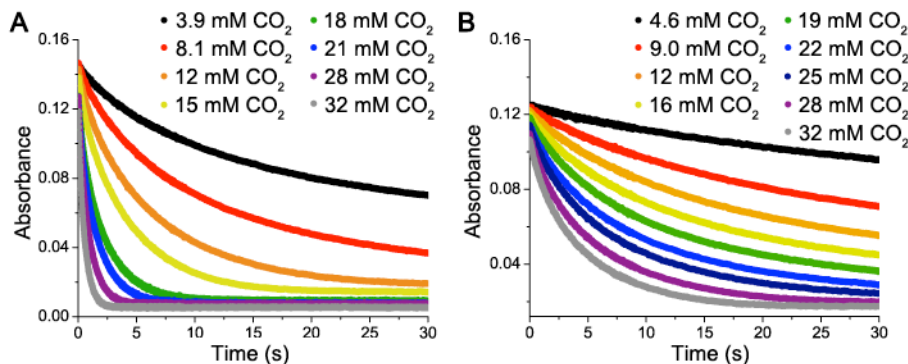

**Fig. S10.** (A) Decays of the  $\nu_{\text{CO}}$  stretch at 1940  $\text{cm}^{-1}$  as a function of time for the reaction of 2.5 mM **1** with various concentrations of  $\text{CO}_2$ . (B) Decays of the  $\nu_{\text{CO}}$  stretch at 1940  $\text{cm}^{-1}$  as a function of time for the reaction of 2.5 mM **2** with various concentrations of  $\text{CO}_2$ .

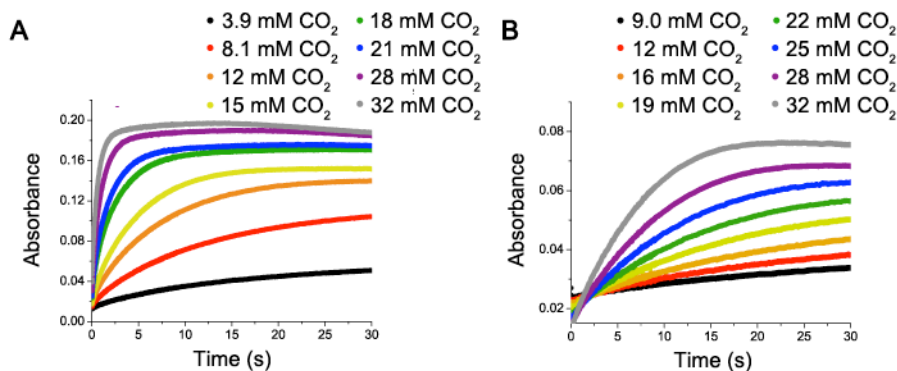

**Fig. S11.** (A) Growths of the  $\nu_{\text{CO}}$  stretch at 1901  $\text{cm}^{-1}$  as a function of time for the reaction of 2.5 mM **1** with various concentrations of  $\text{CO}_2$ . (B) Growths of the  $\nu_{\text{CO}}$  stretch at 1901  $\text{cm}^{-1}$  as a function of time for the reaction of 2.5 mM **2** with various concentrations of  $\text{CO}_2$ .

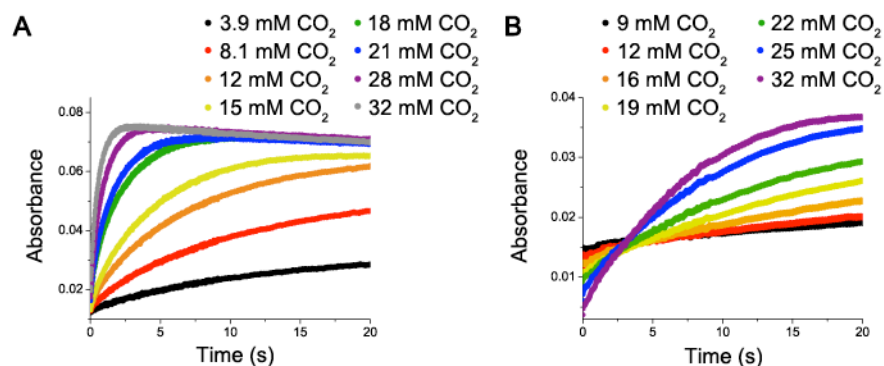

**Fig. S12.** (A) Growths of the  $\nu_{\text{CO}}$  stretch at  $2001\text{ cm}^{-1}$  as a function of time for the reaction of  $2.5\text{ mM}$  **1** with various concentrations of  $\text{CO}_2$ . (B) Growths of the  $\nu_{\text{CO}}$  stretch at  $2009\text{ cm}^{-1}$  as a function of time for the reaction of  $2.5\text{ mM}$  **2** with various concentrations of  $\text{CO}_2$ .

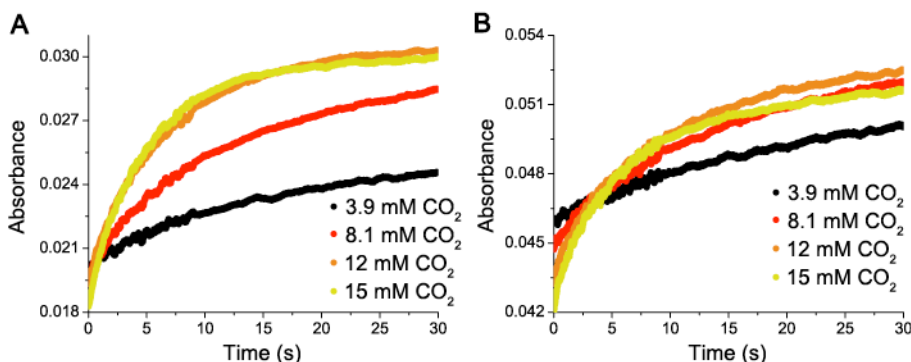

**Fig. S13.** (A) Growths of the  $\nu_{\text{OCO}}$  stretch at  $1616\text{ cm}^{-1}$  as a function of time for the reaction of  $2.5\text{ mM}$  **1** with various concentrations of  $\text{CO}_2$ . (B) Growths of the  $\nu_{\text{OCO}}$  stretch at  $1662\text{ cm}^{-1}$  as a function of time for the reaction of  $2.5\text{ mM}$  **1** with various concentrations of  $\text{CO}_2$ . The growths of these  $\nu_{\text{OCO}}$  stretches saturate around  $12\text{ mM}$   $\text{CO}_2$  due to the limited supply of  $\text{H}^+$  in solution.

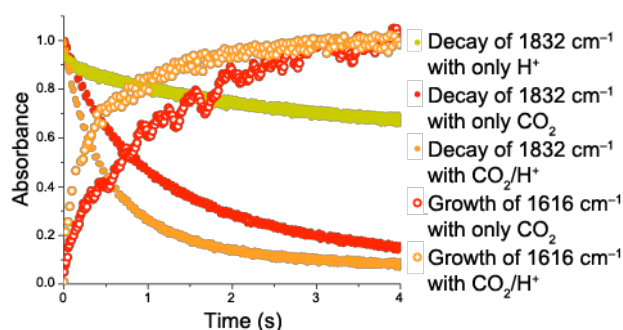

**Fig. S14.** Comparison of the decay rates of the  $\nu_{\text{CO}}$  stretch at  $1832\text{ cm}^{-1}$  and the growth rates of the  $\nu_{\text{OCO}}$  stretch at  $1616\text{ cm}^{-1}$  for the reaction of  $2.5\text{ mM}$  **1** with various substrates. Data in yellow correspond to reactions with only  $\text{H}^+$  added ( $3\text{ mM}$  MeOH), data in red correspond to reactions with only  $\text{CO}_2$  added ( $25\text{ mM}$ ), and data in orange correspond to reactions with both  $\text{CO}_2$  and  $\text{H}^+$  added ( $25\text{ mM}$  and  $3\text{ mM}$ , respectively). Initial absorbance values for the decays of  $1832\text{ cm}^{-1}$  are normalized to 1 by multiplying each data set by 7.5. Saturated absorbance values for the growths of  $1616\text{ cm}^{-1}$  are normalized to 1 by multiplying each data set by 25.

Pseudo-first order kinetics were fit by plotting the decay of the lowest energy  $\nu_{\text{CO}}$  stretch at  $1832\text{ cm}^{-1}$  for **1** and  $1840\text{ cm}^{-1}$  for **2** vs. time (Fig. S15 and S16). Pseudo-first order kinetic curves were fit through a minimum of two half-lives for each run at all concentrations of  $\text{CO}_2$  studied. Plotting  $\ln(A/A_0)$  vs. time gave linear plots through the first two half-lives of the reaction and the slope of the plots gave observed

rates in units of  $s^{-1}$  for each complex at each  $CO_2$  concentration (Table S1).<sup>4</sup>

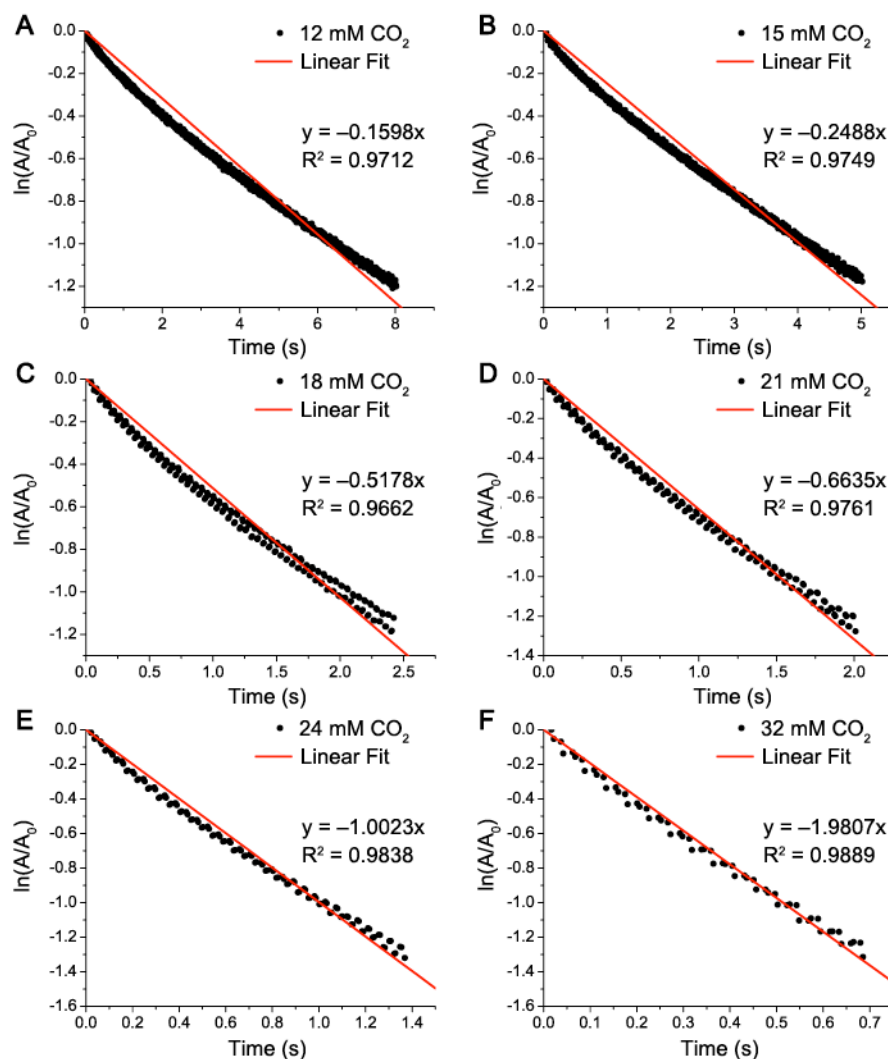

**Fig. S15.** Plot of  $\ln(A/A_0)$  vs. time for the  $\nu_{CO}$  stretch at  $1832\text{ cm}^{-1}$  for the reaction of 2.5 mM **1** with (A) 12 mM  $CO_2$ , (B) 15 mM  $CO_2$ , (C) 18 mM  $CO_2$ , (D) 21 mM  $CO_2$ , (E) 24 mM  $CO_2$ , and (F) 32 mM  $CO_2$ . For each plot, kinetic data is shown in black and a linear fit of the data is shown in red. Similar plots and fits were obtained for the reactions of **1** with 3.9, 8.1, and 28 mM  $CO_2$ .

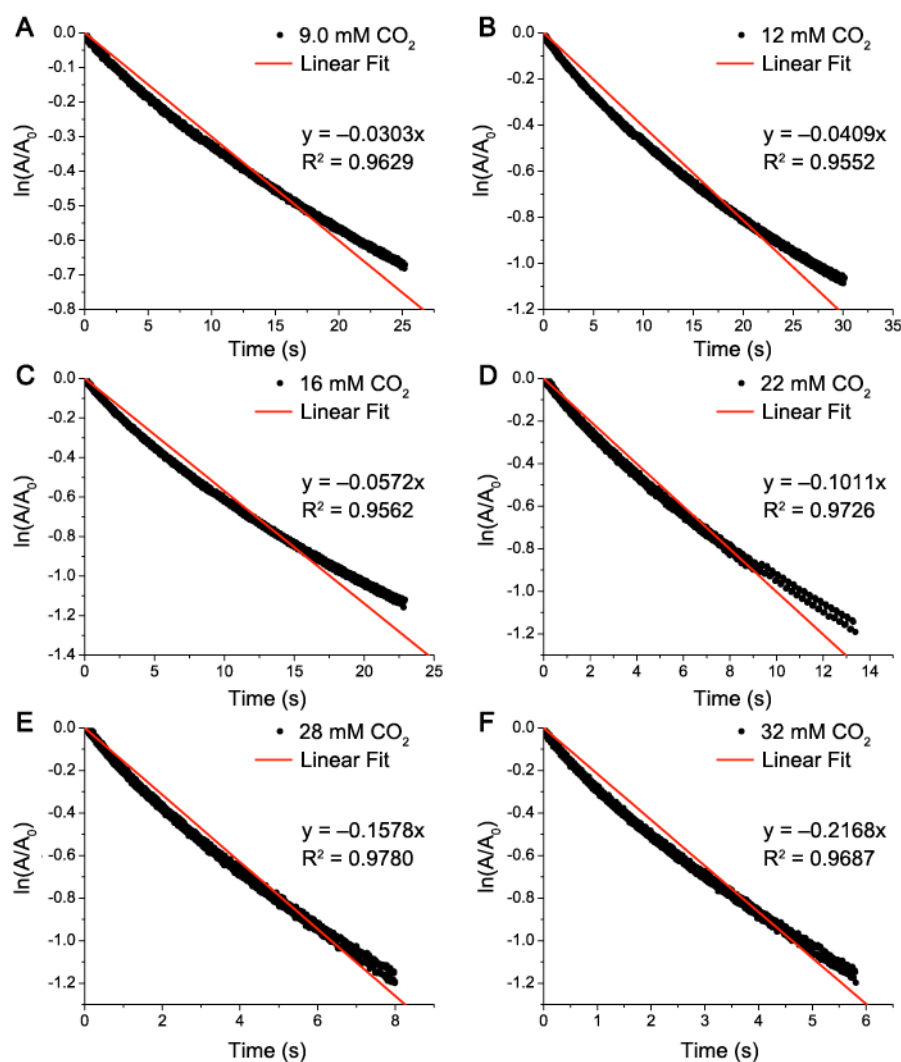

**Fig. S16.** Plot of  $\ln(A/A_0)$  vs. time for the  $\nu_{\text{CO}}$  stretch at  $1840\text{ cm}^{-1}$  for the reaction of 2.5 mM **2** with (A) 9.0 mM  $\text{CO}_2$ , (B) 12 mM  $\text{CO}_2$ , (C) 16 mM  $\text{CO}_2$ , (D) 22 mM  $\text{CO}_2$ , (E) 28 mM  $\text{CO}_2$ , and (F) 32 mM  $\text{CO}_2$ . For each plot, kinetic data are shown in black and a linear fit of the data is shown in red. Similar plots and fits were obtained for the reactions of **2** with 4.6, 19, 25, and 31 mM  $\text{CO}_2$ .

**Table S2.** Pseudo-first order rates for the reaction of 2.5 mM **1** and **2** with various concentrations of  $\text{CO}_2$  with 18-crown-6 in solution. Rates were obtained by following the decay of the  $\nu_{\text{CO}}$  stretch at  $1832$  and  $1840\text{ cm}^{-1}$  in stopped-flow IR spectroscopy experiments.

| $[\text{CO}_2]$ (mM) | Rate of <b>1</b> ( $\text{s}^{-1}$ ) | $[\text{CO}_2]$ (mM) | Rate of <b>2</b> ( $\text{s}^{-1}$ ) |
|----------------------|--------------------------------------|----------------------|--------------------------------------|
| 15                   | 0.25                                 | 16                   | 0.057                                |
| 18                   | 0.52                                 | 19                   | 0.079                                |
| 21                   | 0.66                                 | 22                   | 0.10                                 |
| 24                   | 1.0                                  | 25                   | 0.13                                 |
| 28                   | 2.0                                  | 28                   | 0.16                                 |
| 32                   | 2.0                                  | 31                   | 0.21                                 |

Plots of  $\ln(A/A_0)$  vs. time gave better fits than plotting either  $1/[\text{Re}]$  or  $[\text{Re}]^{1/2}$  vs. time. Second order kinetic analysis was also performed for both complexes at all concentrations of  $\text{CO}_2$  studied. This analysis gave the same rates within error as the pseudo-first order fits, but the agreement between the data and the second order kinetic fits was not as suitable as pseudo-first order kinetic fits. As expected, lower concentrations of  $\text{CO}_2$  fit second order kinetics slightly better due to a larger change in  $[\text{CO}_2]$  over the



course of the reaction, while higher concentrations of CO<sub>2</sub> fit pseudo-first order kinetics better. Pseudo-first order kinetic analysis was also completed for the growths of  $\nu_{\text{CO}}$  stretches at 1901 cm<sup>-1</sup> for complexes **1** and **2**. Rates and half-lives for the growth of these peaks were the same as the decays of  $\nu_{\text{CO}}$  stretches at 1832 and 1840 cm<sup>-1</sup> (for **1** and **2**, respectively), within experimental error.

We attempted to calculate separate rate constants for the reaction of **2** with CO<sub>2</sub> for the formation of the Re(I) product and for the formation of the dimer, [Re(bpy)(CO)<sub>3</sub>]<sub>2</sub>. For the formation of the Re(I) product, we attempted to fit kinetic data for the growth of the  $\nu_{\text{CO}}$  stretches at 2009 and 1901 cm<sup>-1</sup>. For the formation of the dimer, we attempted to fit kinetic data for the growth of the  $\nu_{\text{CO}}$  stretches at 1986, 1948, 1886, and 1867 cm<sup>-1</sup>. However, because most of these  $\nu_{\text{CO}}$  stretches overlap with one another and/or overlap with starting material  $\nu_{\text{CO}}$  stretches, we were unsuccessful in calculating separate rate constants using this analysis.

Plotting pseudo-first order rates ( $k_{\text{obs}}$ ) vs. [CO<sub>2</sub>] (for [CO<sub>2</sub>] ≥ 15 mM) gives rise to fairly linear plots and second order rate constants ( $k_{\text{CO}_2}$ ) of  $120 \pm 20 \text{ M}^{-1}\text{s}^{-1}$  for **1** and  $12 \pm 1.5 \text{ M}^{-1}\text{s}^{-1}$  for **2** (Figure S17 and S18). We believe that including only [CO<sub>2</sub>] ≥ 15 mM is justified because we are most interested in comparing the kinetics and mechanisms of these stopped-flow reactions with electrochemical experiments. In electrochemical experiments, we usually have greater than 40-fold excess of CO<sub>2</sub> to the catalyst. Electrochemical reactions are also first order in [CO<sub>2</sub>];<sup>5</sup> therefore, the kinetics of these stopped-flow reactions (at high [CO<sub>2</sub>] to [Re] ratios) tend to agree well with electrochemical experiments.

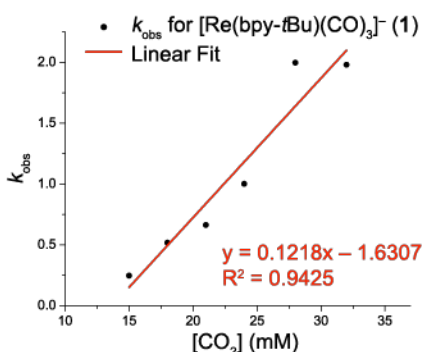

**Fig. S17.** Plot of  $k_{\text{obs}}$  vs. [CO<sub>2</sub>] for the reaction of 2.5 mM **1** with CO<sub>2</sub>. A linear fit of the kinetic data is shown in red ( $y = 0.1218x - 1.6307$ ). A pseudo-first order rate constant ( $k_{\text{CO}_2}$ ) of  $120 \pm 20 \text{ M}^{-1}\text{s}^{-1}$  was obtained from this linear fit.

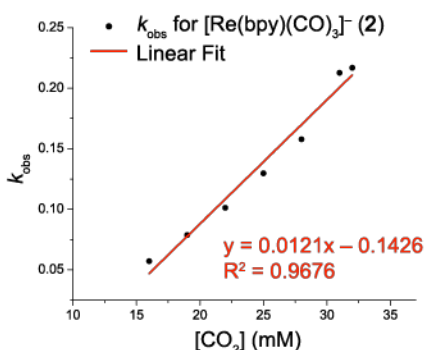

**Fig. S18.** Plot of  $k_{\text{obs}}$  vs. [CO<sub>2</sub>] for the reaction of 2.5 mM **2** with CO<sub>2</sub>. A linear fit of the kinetic data is shown in red ( $y = 0.0121x - 0.1426$ ). A pseudo-first order rate constant ( $k_{\text{CO}_2}$ ) of  $12 \pm 1.5 \text{ M}^{-1}\text{s}^{-1}$  was obtained from this linear fit.

### Removal of 18-crown-6

Stopped-flow IR spectroscopy experiments were repeated after removing 18-crown-6 that was in solution to form anions **1** and **2**. The IR spectra of **1** and **2** without 18-crown-6 in solution are shown in Fig. S19. The decay of the  $\nu_{\text{CO}}$  stretch at 1832 cm<sup>-1</sup> for the reaction of **1** with CO<sub>2</sub> without 18-crown-6 in solution is shown in Fig. S20A. Here, this  $\nu_{\text{CO}}$  stretch had almost entirely decayed at the time of the first data point collection, making it impossible to perform detailed kinetic analysis on these reactions. Although we

cannot calculate a rate constant directly through kinetic analysis for the reaction of **1** without 18-crown-6, we can estimate this rate constant at  $15,000 \text{ M}^{-1}\text{s}^{-1}$  by employing both the calculated rate constant for the reaction of **2** without 18-crown-6 ( $k_{\text{CO}_2} = 1,500 \text{ M}^{-1}\text{s}^{-1}$ ) and the difference in rate constants for the reactions of **1** and **2** with 18-crown-6 in solution (10-fold). This estimation is valid if the reaction of **1** without 18-crown-6 is approximately 10 times faster than the reaction of **2** without 18-crown-6 (as was true for reactions with 18-crown-6 in solution). This estimate of the rate constant is in good agreement with the rate constant in electrocatalysis for **1** ( $k_{\text{CO}_2} = 10,000 \text{ M}^{-1}\text{s}^{-1}$ ).

For the reaction of **2** without 18-crown-6, decay of the  $\nu_{\text{CO}}$  stretch at  $1840 \text{ cm}^{-1}$  is observable at low  $[\text{CO}_2]$  (Fig. S20B), allowing for kinetic analysis. Experiments without 18-crown-6 in solution indicate that reactions are first order in  $[\text{CO}_2]$ . Fig. S21 shows that a 2-fold increase in  $[\text{CO}_2]$  results in approximately a 2-fold increase in the observed rate constant ( $k_{\text{obs}}$ ), which is consistent with a first order  $[\text{CO}_2]$  dependence. Because of this, we are confident that reactions with 18-crown-6 in solution are also first order in  $[\text{CO}_2]$  at high concentrations of  $\text{CO}_2$ . Calculated rate constants for reactions of **2** without 18-crown-6 in solution are shown in Table S2.

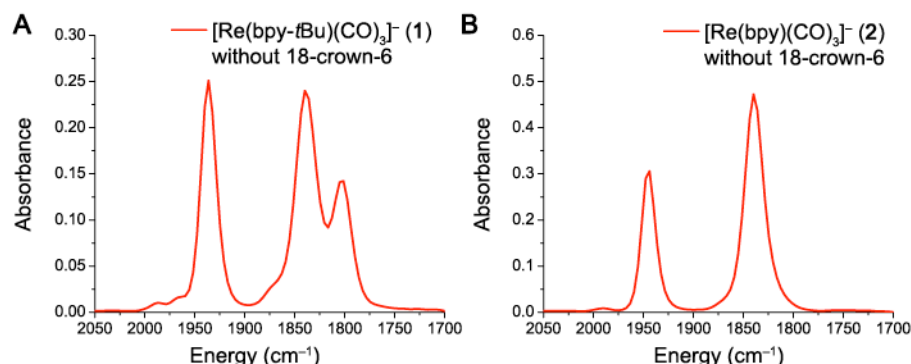

**Fig. S19.** (A) IR spectrum of **1** without 18-crown-6 in solution. (B) IR spectrum of **2** without 18-crown-6 in solution. Three  $\nu_{\text{CO}}$  stretches are observed in the spectrum of **1** without 18-crown-6 due to potassium coordination to the carbonyl ligands.

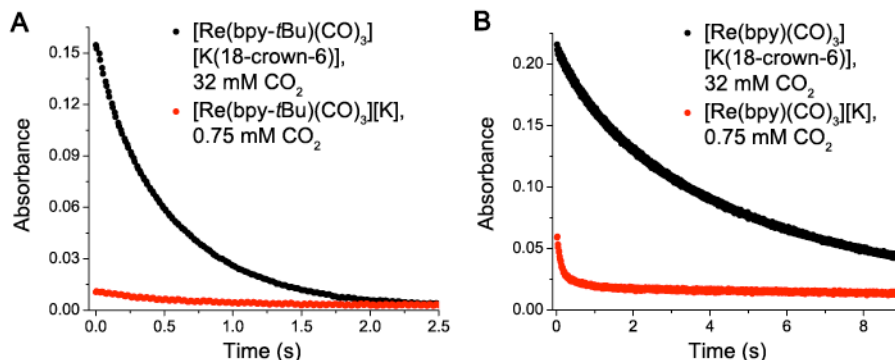

**Fig. S20.** (A) Decay of the  $\nu_{\text{CO}}$  stretch at  $1832 \text{ cm}^{-1}$  for the reaction of **1** with  $\text{CO}_2$  with 18-crown-6 in solution (black,  $32 \text{ mM CO}_2$ ) and without 18-crown-6 in solution (red,  $0.75 \text{ mM CO}_2$ ). (B) Decay of the  $\nu_{\text{CO}}$  stretch at  $1840 \text{ cm}^{-1}$  for the reaction of **2** with  $\text{CO}_2$  with 18-crown-6 in solution (black,  $32 \text{ mM CO}_2$ ) and without 18-crown-6 in solution (red,  $0.75 \text{ mM CO}_2$ ).

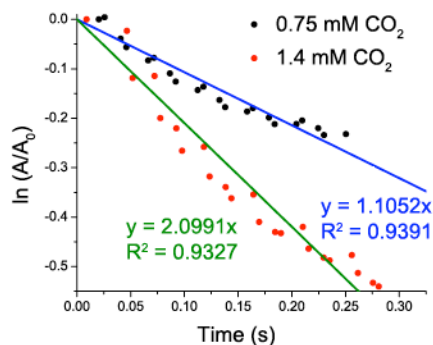

**Fig. S21.** Plot of  $\ln(A/A_0)$  vs. time ( $\nu_{\text{CO}} = 1832 \text{ cm}^{-1}$ ) for the reaction of 2.5 mM **1** with  $\text{CO}_2$  without 18-crown-6 in solution. The reaction with 0.75 mM  $\text{CO}_2$  is shown in black, with a linear fit of the kinetic data shown in blue. The reaction with 1.4 mM  $\text{CO}_2$  is shown in red, with a linear fit of the kinetic data shown in green.

**Table S3.** Pseudo-first order rates for the reaction of 2.5 mM **2** with various concentrations of  $\text{CO}_2$  without 18-crown-6 in solution. Rates were obtained by following the decay of the  $\nu_{\text{CO}}$  stretch at  $1840 \text{ cm}^{-1}$  in stopped-flow IR spectroscopy experiments.

| $[\text{CO}_2]$ (mM) | Rate of <b>2</b> , no 18-crown-6 ( $\text{s}^{-1}$ ) |
|----------------------|------------------------------------------------------|
| 0.75                 | 1.1                                                  |
| 1.4                  | 2.1                                                  |

### Comparison with Previous Stopped-flow UV-Vis Spectroscopy Studies

In previous stopped-flow UV-Vis spectroscopy studies, the reaction of **1** without 18-crown-6 with  $\text{CO}_2$ -saturated THF was monitored by the decay of the strong absorption at  $570 \text{ nm}$ .<sup>6</sup> A pseudo-first order rate constant ( $k_{\text{CO}_2}$ ) of  $350 \text{ M}^{-1}\text{s}^{-1}$  was calculated for the reaction of  $0.06 \text{ mM}$  **1** with  $\text{CO}_2$ . This rate constant is much lower than the rate constant obtained in this study ( $\sim 15,000 \text{ M}^{-1}\text{s}^{-1}$ ). However, the concentration of **1** was significantly smaller in the UV-Vis experiments ( $0.06 \text{ mM}$ ) than in these current IR experiments ( $2.5 \text{ mM}$ ). Additionally, the UV-Vis experiments involved only one  $\text{CO}_2$  concentration (*ca.*  $100 \text{ mM}$ ), while our IR experiments involved a wide range of  $\text{CO}_2$  concentrations (*ca.*  $1\text{--}50 \text{ mM}$ ). These two factors make it difficult to directly compare the two studies.

In the previous stopped-flow UV-Vis spectroscopy experiments, tetrabutylammonium hexafluorophosphate (TBAH) was added as an electrolyte in solution in order to replicate electrochemical experiments. We added TBAH to solutions of the reduced anions in our stopped-flow IR spectroscopy reactions. However, we did not see any significant difference in reaction rates between these reactions and reactions without TBAH. This indicates that the addition of electrolyte in solution is only useful in an electrochemical manner in order to facilitate electron flow through solution. Since the catalytically-active species are synthetically formed prior to reaction, TBAH does not aid the progression of these stopped-flow reactions. Because we were able to obtain rates for the reaction of **1** with  $\text{CO}_2$  that are in reasonable agreement with previous electrocatalysis experiments, we believe this stopped-flow IR spectroscopy study gives much more accurate results than the previously reported stopped-flow UV-Vis spectroscopy study. In addition, stopped-flow IR spectroscopy provides significantly more information about the mechanism and products associated with reactions of anions **1** and **2** with  $\text{CO}_2$  than the previous stopped-flow UV-Vis spectroscopy experiments.

### Density Functional Theory (DFT) Calculations

In DFT-calculated  $\text{Re}(\text{bpy})(\text{CO})_3(\text{CO}_2\text{H})$ , a distinct bipyridine-related stretch occurs at  $1453 \text{ cm}^{-1}$ , much lower than the observed  $1662$  and  $1616 \text{ cm}^{-1}$  of our stopped-flow product. Therefore, the stretches at  $1662$  and  $1616 \text{ cm}^{-1}$  are not bipyridine-related. DFT-calculated  $[\text{Re}(\text{bpy-R})(\text{CO})_3(\text{CO}_2)]^-$  has  $\nu_{\text{OCO}}$  stretches at  $1541$  and  $1535 \text{ cm}^{-1}$  for  $\text{R} = t\text{Bu}$  and  $\text{R} = \text{H}$ , respectively, and DFT-calculated  $[\text{Re}(\text{bpy-R})(\text{CO})_3(\text{CO}_2)][\text{K}]$  has  $\nu_{\text{OCO}}$  stretches at  $1448$  and  $1470 \text{ cm}^{-1}$  for  $\text{R} = t\text{Bu}$  and  $\text{R} = \text{H}$ , respectively. This suggests that the

product in our stopped-flow reactions is not  $[\text{Re}(\text{bpy-R})(\text{CO})_3(\text{CO}_2)]^-$  or  $[\text{Re}(\text{bpy-R})(\text{CO})_3(\text{CO}_2)][\text{K}]$ , but rather  $\text{Re}(\text{bpy})(\text{CO})_3(\text{CO}_2\text{H})$ . We also used DFT to calculate the interaction of  $\text{Re}(\text{bpy})(\text{CO})_3(\text{CO}_2\text{H})$  with  $\text{K}^+$ . In the DFT structure of  $[\text{Re}(\text{bpy})(\text{CO})_3(\text{CO}_2\text{H})][\text{K}]$ , the potassium ion partially coordinates to the  $\text{CO}_2\text{H}$ -adduct and to one or two of the carbonyl ligands (Fig. S24). This causes a  $63\text{ cm}^{-1}$  shift for the  $\nu_{\text{OCO}}$  stretch, from  $1617\text{ cm}^{-1}$  to  $1554\text{ cm}^{-1}$ . Since many orientations between the  $\text{Re}-\text{CO}_2\text{H}$  species and  $\text{K}^+$  ions are probable in the stopped-flow reactions, this can cause a range of observed  $\nu_{\text{OCO}}$  stretches. We use this reasoning to justify the two observed  $\nu_{\text{OCO}}$  stretches in our stopped-flow product. These two  $\nu_{\text{OCO}}$  stretches could also result from equilibrium between a  $\text{Re}-\text{CO}_2\text{H}$  and  $\text{Re}-\text{CO}_2^-$  species.

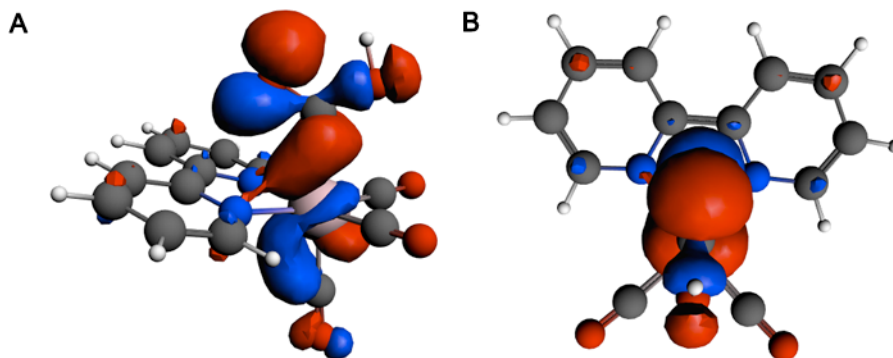

**Fig. S22.** Side and top view of highest occupied molecular orbital (HOMO) of  $\text{Re}(\text{bpy})(\text{CO})_3(\text{CO}_2\text{H})$  (**2-CO<sub>2</sub>H**) calculated with ADF 2012.1

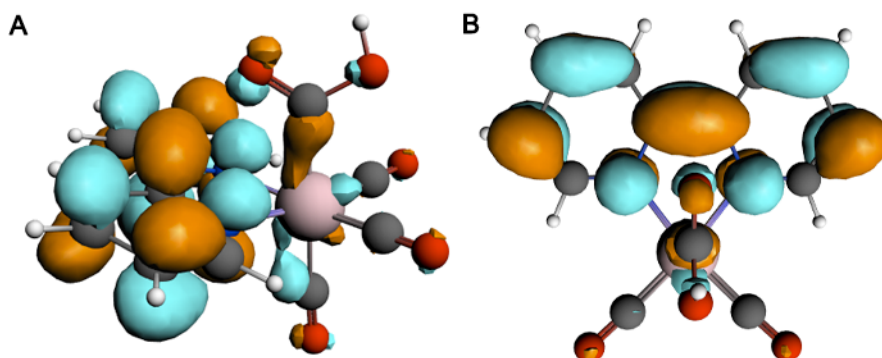

**Fig. S23.** Side and top view of the lowest unoccupied molecular orbital (LUMO) of  $\text{Re}(\text{bpy})(\text{CO})_3(\text{CO}_2\text{H})$  (**2-CO<sub>2</sub>H**) calculated with ADF 2012.1

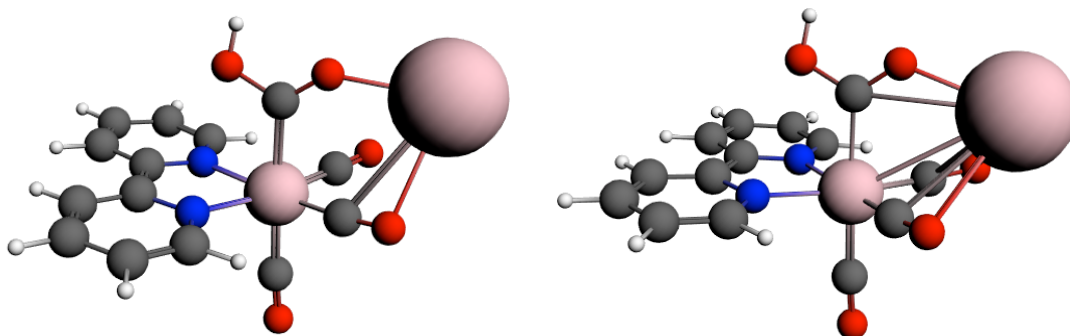

**Fig. S24.** DFT-calculated structure of  $[\text{Re}(\text{bpy})(\text{CO})_3(\text{CO}_2\text{H})][\text{K}]$  showing two different converged structures, calculated with ADF 2012.1

**Geometry Optimized xyz Coordinates for Re(bpy)(CO)<sub>3</sub>(CO<sub>2</sub>H) (2-CO<sub>2</sub>H)**

| Atom | X         | Y         | Z (Angstrom) |
|------|-----------|-----------|--------------|
| Re   | 3.026371  | 1.968157  | 15.694743    |
| O    | 5.214482  | 3.937542  | 16.664230    |
| O    | 5.120679  | 0.162458  | 14.294824    |
| O    | 2.720793  | 3.648001  | 13.064137    |
| O    | 2.335121  | 0.357960  | 18.243248    |
| O    | 4.549107  | 0.492364  | 17.942706    |
| N    | 1.386362  | 2.878925  | 16.798065    |
| N    | 1.325443  | 0.643089  | 15.396700    |
| C    | 1.452844  | 4.071453  | 17.431245    |
| H    | 2.366593  | 4.637977  | 17.275613    |
| C    | 0.433364  | 4.555302  | 18.235119    |
| H    | 0.546228  | 5.521929  | 18.721678    |
| C    | -0.718159 | 3.780410  | 18.403438    |
| C    | -0.801662 | 2.560651  | 17.748780    |
| H    | -1.689960 | 1.944479  | 17.857742    |
| C    | 0.261255  | 2.121637  | 16.947918    |
| C    | 0.229933  | 0.878978  | 16.175349    |
| C    | -0.861738 | 0.000346  | 16.169113    |
| H    | -1.725116 | 0.202249  | 16.797351    |
| C    | -0.836882 | -1.129368 | 15.365047    |
| C    | 0.283730  | -1.356465 | 14.560313    |
| H    | 0.350610  | -2.224485 | 13.907762    |
| C    | 1.333648  | -0.453699 | 14.606530    |
| H    | 2.226289  | -0.594446 | 14.003576    |
| C    | 4.412462  | 3.182822  | 16.284229    |
| C    | 4.353632  | 0.861745  | 14.823473    |
| C    | 2.790084  | 3.022446  | 14.042276    |
| C    | 3.257121  | 0.778282  | 17.551521    |
| H    | 4.456204  | -0.035051 | 18.768603    |
| H    | -1.537354 | 4.126197  | 19.032043    |
| H    | -1.678002 | -1.820802 | 15.359661    |

# **Input File for ADF Calculations of Re(bpy)(CO)<sub>3</sub>(<sup>13</sup>CO<sub>2</sub>H)**

```
#S -S /bin/bash
#S -cwd

#S -o output
#S -e $JOB_ID.err
#S -j y
#S -M mdsampso@ucsd.edu
#S -m beas
#S -N Rebpy_CO2H_GO
#S -q all.q
#S -pe mpi 8

export cur_dir=""`pwd`"
echo Running as user `whoami` on `hostname` at `date` in dir `pwd`
export temp_dir="/state/partition1/`whoami`. $JOB_ID"
mkdir $temp_dir
cd $temp_dir
echo With temp dir $temp_dir

# ADF enviroment variables, change as you need

export ADFHOME=/share/apps/adf2012.01/
export ADFBIN=/share/apps/adf2012.01/bin
export ADFRESOURCES=/share/apps/adf2012.01/atomicdata
export SCMLICENSE=/share/apps/adf2012.01/license
export SCM_TMPDIR=$temp_dir
export SCM_USETMPDIR=yes
export NSCM=8
export SCM_IOBUFFERSIZE=512

#Put main code here *****

$ADFBIN/adf -n8 \
<<< "
TITLE Rebpy_CO2H_GO

MAXMEMORYUSAGE 23000

RELATIVISTIC ZORA

UNRESTRICTED

CHARGE 0 0

SCF
DIIS
END

XC
```

LDA VWN  
 GGA Becke Perdew  
 END

SYMMETRY NOSYM

ATOMS

|     |           |           |           |
|-----|-----------|-----------|-----------|
| Re  | 3.023550  | 1.972664  | 15.678732 |
| O   | 5.205909  | 3.948885  | 16.639795 |
| O   | 5.149021  | 0.126446  | 14.386474 |
| O   | 2.832369  | 3.573668  | 12.981966 |
| O   | 2.362839  | 0.385186  | 18.249978 |
| O   | 4.570673  | 0.636446  | 17.988275 |
| N   | 1.379558  | 2.869507  | 16.808030 |
| N   | 1.316574  | 0.638507  | 15.398115 |
| C   | 1.444131  | 4.029462  | 17.493166 |
| H   | 2.349623  | 4.612851  | 17.351042 |
| C   | 0.437306  | 4.474449  | 18.337182 |
| H   | 0.579329  | 5.421490  | 18.851941 |
| C   | -0.725085 | 3.707393  | 18.517790 |
| C   | -0.783280 | 2.511996  | 17.799223 |
| H   | -1.655735 | 1.870764  | 17.894593 |
| C   | 0.258717  | 2.107443  | 16.962035 |
| C   | 0.212774  | 0.882774  | 16.160502 |
| C   | -0.898548 | 0.037491  | 16.117181 |
| H   | -1.763549 | 0.278206  | 16.729811 |
| C   | -0.926474 | -1.096744 | 15.303049 |
| C   | 0.228229  | -1.330759 | 14.539418 |
| H   | 0.308320  | -2.189183 | 13.876732 |
| C   | 1.304116  | -0.458460 | 14.614557 |
| H   | 2.200934  | -0.629016 | 14.025468 |
| C   | 4.405108  | 3.193887  | 16.256185 |
| C   | 4.359964  | 0.842738  | 14.858522 |
| C   | 2.832226  | 2.987694  | 13.987638 |
| C.L | 3.272851  | 0.834807  | 17.561397 |
| H   | 4.487803  | 0.127480  | 18.826692 |
| H   | -1.531070 | 4.025386  | 19.177479 |
| H   | -1.790281 | -1.758673 | 15.262951 |

END

AtomProps  
 C.L m=13.0035  
 END

GEOMETRY

GO

Iterations 200

END

AnalyticalFreq

END

BASIS

type TZ2P

END

```
END INPUT
"
# end main code *****

cp * $cur_dir/

# Optional, have to manually clean up otherwise
rm -r -f $temp_dir
```

### <sup>13</sup>C NMR of the reaction of [Re(bpy-*t*Bu)(CO)<sub>3</sub>]<sup>−</sup> (**1**) with <sup>13</sup>CO<sub>2</sub>

In order to further prove the existence of a Re–CO<sub>2</sub>H species as a product in the reaction of **1** with CO<sub>2</sub>, we utilized <sup>13</sup>C NMR spectroscopy. The reaction of anion **1** with <sup>13</sup>CO<sub>2</sub> in THF-*d*<sub>8</sub> results in a <sup>13</sup>C NMR spectrum with peaks at 161.61 and 168.25 ppm, in addition to peaks for the bipyridine carbons and carbonyl ligands (Fig. S26). We believe that the peak at 161.61 ppm corresponds to the –CO<sub>2</sub>H group in the reaction product. The peak at 168.25 ppm could result from either bicarbonate (HCO<sub>3</sub><sup>−</sup>) or degradation of the Re–CO<sub>2</sub>H species into a  $\mu_2$ - $\eta^2$ -CO<sub>2</sub>-bridged complex, *fac*, *fac*-Re(bpy-*t*Bu)(CO)<sub>3</sub>(CO<sub>2</sub>)Re(bpy-*t*Bu)(CO)<sub>3</sub> (as seen in similar studies by Gibson).<sup>7</sup> Bicarbonate could be formed in a variety of degradation reactions, such as by degradation of the Re–CO<sub>2</sub>H species to [Re(bpy-*t*Bu)(CO)<sub>4</sub>]<sup>+</sup> and OH<sup>−</sup> which can rapidly react with the excess CO<sub>2</sub>. For comparison, Fig. S26 shows the <sup>13</sup>C NMR spectrum of KHCO<sub>3</sub> in a mixture of THF-*d*<sub>8</sub>/H<sub>2</sub>O, and a similar peak at 168.91 ppm is observed.

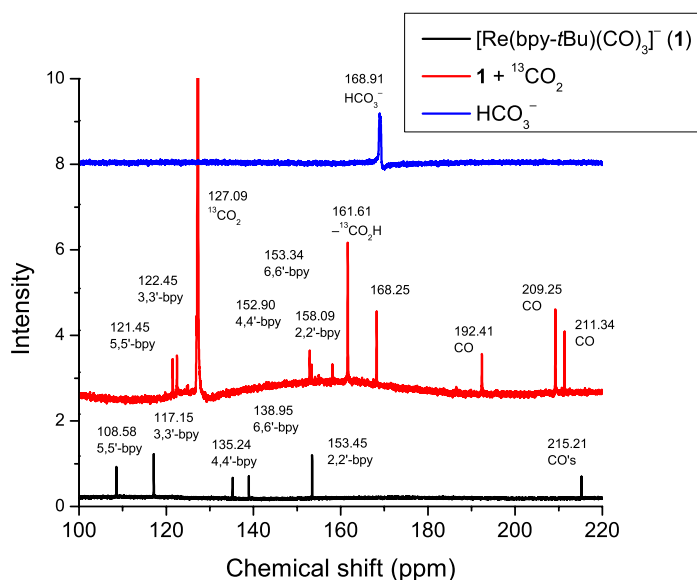

**Fig. S25.** <sup>13</sup>C NMR spectra (from 100–220 ppm) for the reaction between [Re(bpy-*t*Bu)(CO)<sub>3</sub>]<sup>−</sup> (**1**) and <sup>13</sup>CO<sub>2</sub> in THF-*d*<sub>8</sub>, mimicking stopped-flow reactions. The starting anionic complex **1** is shown in black and the reaction product between **1** and <sup>13</sup>CO<sub>2</sub> is shown in red. The <sup>13</sup>C NMR spectrum of bicarbonate (HCO<sub>3</sub><sup>−</sup>) in a THF-*d*<sub>8</sub>/H<sub>2</sub>O mixture is shown in blue for comparison purposes. The assignments for the <sup>13</sup>C NMR chemical shifts are shown in the figure.

### References

- 1 F. P. A. Johnson, M. W. George, F. Hartl and J. J. Turner, *Organometallics*, 1996, **15**, 3374.
- 2 E. E. Benson and C. P. Kubiak, *Chem. Commun.*, 2012, **48**, 7374.
- 3 J. M. Smieja and C. P. Kubiak, *Inorg. Chem.*, 2010, **49**, 9283.
- 4 K. A. Connors, *Chemical kinetics, the study of reaction rates in solution*, Wiley-VCH Publishers, Weinheim, Germany, 1991.
- 5 K.-Y. Wong, W.-H. Chung and C.-P. Lau, *J. Electroanal. Chem.*, 1998, **453**, 161.



- 6 J. M. Smieja, E. E. Benson, B. Kumar, K. A. Grice, C. S. Seu, A. J. M. Miller, J. M. Mayer and C. P. Kubiak, *Proc. Nat. Acad. Sci., USA*, 2012, **109**, 15646.
- 7 D. H. Gibson and X. Yin, *J. Am. Chem. Soc.*, 1998, **120**, 11200.
